# Supplementary material for: Insight into congener substitution effects on the combustion chemistry of tetramethoxysilane and tetramethoxymethane: an experimental and kinetic modeling study
Source: Royal Society of Chemistry journal article supplement (doi:10.1039/d4cp04168b), 2025-01-01
Supplement: d4cp04168b2.xlsx [file d4cp04168b2.xlsx]

## Sheet: Laminar burning velocities
TMOS laminar burning velocity@423 K, 1 atm
ϕ	LBV (cm/s)	uncertainty
0.8	49.6088	1.89462
0.9	56.637	2.00233
1	62.077	2.2074
1.1	65.7377	2.30445
1.2	67.2645	2.40137
1.3	63.5812	2.38598
1.4	57.4275	2.80902
1.5	48.8817	2.00386
TMOM laminar burning velocity @423 K, 1 atm
ϕ	LBV (cm/s)	uncertainty
0.8	51.1039	1.80519
0.9	59.6993	2.08972
1	66.2294	2.48606
1.1	69.8599	2.40954
1.2	72.3112	2.51014
1.3	71.1866	2.43427
1.4	65.1978	2.24347
1.5	55.6653	2.33552
